1 **Nonpolar Residues in the Presumptive Pore-Lining Helix of Mechanosensitive Channel**  
2 **MSL10 Influence Channel Behavior and Confirm a Non-Conducting Function**

3  
4 **Authors**

5 Grigory Makshev<sup>1,2</sup>, Jennette M. Shoots<sup>1</sup>, Simran Ohri<sup>1</sup> and Elizabeth S. Haswell<sup>1,3</sup>

6  
7 **Affiliations**

8 <sup>1</sup>Department of Biology and Center for Engineering MechanoBiology, One Brookings Drive,  
9 Washington University in Saint Louis, Saint Louis, MO 63130; <sup>2</sup>Department of Cell Biology and  
10 Physiology and Center for the Investigation of Membrane Excitability Diseases, Washington  
11 University School of Medicine, Saint Louis, Missouri 63110, USA

12  
13 **Contact Information**

14 <sup>3</sup>corresponding author, [ehaswell@wustl.edu](mailto:ehaswell@wustl.edu), ORCID ID 0000-0002-4246-065X

15  
16  
17  
18  
19  
20  
21  
22 **Running Title**

23 MSL10 Pore Lesions Alter Ion Flux, Not Signaling

24

25 **Abstract**

26 Mechanosensitive (MS) ion channels provide a universal mechanism for sensing and responding  
27 to increased membrane tension. MscS-Like(MSL)10 is a relatively well-studied MS ion channel  
28 from *Arabidopsis thaliana* that is implicated in cell death signaling. The relationship between the  
29 amino acid sequence of MSL10 and its conductance, gating tension, and opening and closing  
30 kinetics remain unstudied. Here we identify several nonpolar residues in the presumptive pore-  
31 lining transmembrane helix of MSL10 (TM6) that contribute to these basic channel properties.  
32 F553 and I554 are essential for wild type channel conductance and the stability of the open state.  
33 G556, a glycine residue located at a predicted kink in TM6, is essential for channel conductance.  
34 The increased tension sensitivity of MSL10 compared to close homolog MSL8 may be attributed  
35 to F563, but other channel characteristics appear to be dictated by more global differences in  
36 structure. Finally, MSL10 F553V and MSL10 G556V provided the necessary tools to establish  
37 that MSL10's ability to trigger cell death is independent of its ion channel function.

38

## 39 Introduction

40  
41 The ability to respond to mechanical stimuli is an ancient and intrinsic property of cells<sup>1,2</sup>. One of  
42 the most universal mechanisms for mechanotransduction is the use of mechanosensitive (MS) ion  
43 channels. MS channels are oligomeric protein structures embedded in the lipid bilayer, and their  
44 primary function is to form a conductive pore in response to increased lateral membrane tension  
45 or force transduced from cytoskeletal filaments<sup>3</sup>. MS channels mediate the perception of external  
46 mechanical stimuli (touch, gravity, vibration) and internal mechanical stresses in plants, animals,  
47 and bacteria<sup>4-6</sup>. Mammalian MS channel dysfunctions are associated with numerous pathologies  
48<sup>7</sup> and both mammalian and bacterial MS channels are under investigation as drug targets<sup>8-10</sup>. It is  
49 therefore important for both basic and for applied reasons to determine the molecular mechanisms  
50 of MS ion channel function, including the relationship between channel structure and its  
51 conductance, gating tension, and opening and closing kinetics.

52  
53 We already have considerable insight into these questions, in part due to decades of research into  
54 the structure and function of a MS ion channel from *Escherichia coli*, the Mechanosensitive ion  
55 channel of Small conductance (*EcMscS*). *EcMscS* is directly opened by membrane tension<sup>11</sup>, has  
56 a unitary conductance of 1.2 nS in giant *E. coli* spheroplasts<sup>12,13</sup> and demonstrates a slight  
57 preference for anions (1.2-3 fold, summarized in<sup>14,15</sup>). The primary physiological function of  
58 *EcMscS* is to promote bacterial survival when subjected to hypoosmotic shock<sup>13,16</sup>. *EcMscS* also  
59 shows inactivation behavior whereby sustained tension leads to a non-conductive state of the  
60 channel that cannot be opened again until a period of recovery<sup>17-21</sup>.

61  
62 A wealth of structural information on MscS is available, derived from several members of the  
63 MscS family from different bacterial species. Crystal structures thought to represent the  
64 conducting state of *EcMscS* or the non-conducting states of MscS from *E. coli*,  
65 *Thermoanaerobacter tengcongensis*, and *Helicobacter pylori*<sup>22-24</sup> have been determined. A cryo-  
66 electron micrograph structure of MscS homolog from *E. coli*, YnaI, has also been reported<sup>25</sup>.  
67 These structures reveal that MscS forms a homoheptamer with a transmembrane (TM) domain  
68 localized to the inner *E. coli* membrane and a cytoplasmic “vestibule”. Each subunit contains an  
69 N-terminal domain comprised of three TM helices, and a soluble C-terminal domain. The most C-

70 terminal of the TM helices, TM3, lines the permeation pore. It comprises two regions, TM3a and  
71 TM3b, which are separated by a distinctive kink at residue G113. Other key residues include L105  
72 and L109, which form the narrowest constriction of the closed or non-conducting pore, and G121,  
73 which is thought to be critical to closed state formation<sup>22,17</sup>.

74  
75 A comparison of the open state versus closed state structures suggest that gating involves swinging  
76 a tension-sensitive paddle made up of the TM1/TM2 helices and twisting TM3a about G113. This  
77 motion allows L105 and L109 to move out of the pore. Mutational analyses support important  
78 roles for L105 and L109<sup>26,27</sup> and have shown that G104, A106 and G108 play critical roles in  
79 channel gating<sup>28,29</sup>. A single mutation in this region, A106V, locks the channel in an open  
80 conformation, and was used to obtain the first open-state crystal structure of *EcMscS*<sup>30</sup>. Mutating  
81 other residues in TM3, such as S114, L118, A120, L123, F127<sup>31</sup> and Q112, A120<sup>16</sup> has less  
82 dramatic impact on channel properties, only modulating its gating and inactivation kinetics.  
83 However, changing the kink-forming residue G113 to alanine prevents inactivation and in  
84 combination with G121A severely alters channel opening and closing<sup>17</sup>. Residues F68 and L111  
85 may form a force-transmitting clutch between TM2 and TM3, transmitting membrane tension  
86 sensed by the TM1/TM2 paddle to the pore-forming TM3.<sup>32</sup> Surprisingly, the channel's weak ion  
87 selectivity is governed by its cytoplasmic cage, rather than the pore-lining TM3<sup>33,34</sup>. In summary,  
88 a combination of modeling and functional assays now provide a general understanding of the  
89 conformational changes that ultimately result in channel gating for *EcMscS*<sup>6,35,36</sup>.

90  
91 These insights into the structural basis of *EcMscS* mechanosensitivity provide a strong foundation  
92 for studying homologs of *EcMscS*, which are found in all kingdoms of life<sup>6,35,36</sup>. The domain  
93 conserved among all these MscS family members is limited to the pore-lining helix and about 100  
94 amino acids of the following soluble domain. The number of predicted transmembrane domains  
95 and the structure of N- and C-termini are highly variable. The channel behavior and physiological  
96 function of multiple *EcMscS* homologs from other bacterial species, archaea, fission yeast, green  
97 algae and land plants have been reported<sup>2,37-40</sup>. These channels are all mechanically gated and  
98 generally function in hypoosmotic stress relief, but have a range of conductances, ion channel  
99 selectivities and play different physiological and developmental roles.

100

101 The ten *EcMscS* homologs encoded in the genome of the model land plant *Arabidopsis thaliana*  
102 have been named MscS-Like or MSL channels <sup>41-49</sup>. MSL proteins exhibit diverse tissue  
103 expression patterns, subcellular localizations and domain structures <sup>50</sup>. To date, MSL1, MSL8 and  
104 MSL10 are the best-characterized MSLs in terms of ion channel physiology. All three provide  
105 tension-gated ion channel activities in native plant cells <sup>5</sup> and/or when expressed in heterologous  
106 systems <sup>51</sup>. MSL1 is localized to the mitochondrial inner membrane <sup>43-45</sup>, while MSL8 and MSL10  
107 are primarily localized to the plasma membrane <sup>45</sup>. The unitary conductances of MSL8 and MSL10  
108 expressed in *Xenopus* oocytes are approximately 60 pS and 105 pS, respectively (compare to 340  
109 pS for *EcMscS* expressed in oocytes) <sup>44,51</sup>. MSL8 and MSL10 have a slightly higher preference for  
110 anions ( $P_{Cl} : P_{Na} = 5.6-6.3$ ) than *EcMscS*. Another intrinsic feature of an MS ion channel is its  
111 tension sensitivity, defined as the amount of tension applied to the membrane required for channel  
112 opening. The tension at which a channel opens may or may not be the same as the tension at which  
113 it closes. Different opening and closing tensions lead to an asymmetric gating profile, and this  
114 phenomenon is referred to as hysteresis. Both MSL10 and MSL8 have lower tension sensitivity  
115 than *EcMscS*, and both exhibit strong hysteresis, with much higher opening than closing pressures  
116 <sup>43,44,52,53</sup>, while *EcMscS* does not. We interpret this to mean that, once opened, MSL8 and MSL10  
117 are very stable and do not close until most of the tension is relieved <sup>43,44</sup>.

118  
119 In terms of physiological function, MSL8 appears to serve in a role analogous to that of MscS, as  
120 it protects pollen from multiple hypoosmotic challenges associated with pollen development and  
121 function <sup>43</sup>. MSL8 is primarily localized to the plasma membrane of pollen grains, where it is  
122 required for full survival of rehydration, germination, and tube growth. Two lesions in the  
123 presumptive pore-lining helix of MSL8, I711S and F720L, alter channel behavior and fail to  
124 complement these mutant phenotypes. These observations link ion flux through the MSL8 channel  
125 to protection from osmotic stresses during pollen development <sup>44</sup>.

126  
127 Much less clear is the functional role of MSL10. MSL10 is required for the predominant MS ion  
128 channel activity in root cells <sup>53</sup>, but to date no other loss-of-function phenotype has been  
129 established. Fortunately, gain-of-function phenotypes have been revealing; overexpression of  
130 MSL10 leads to cell death, as does a single ethyl methanesulfonate-induced point mutation in the  
131 MSL10 C-terminus, S640L (*real*) <sup>51</sup>. Over-expression of the soluble N-terminus of MSL10 is

132 sufficient to induce cell death in tobacco epidermal cells<sup>54,55</sup>. Thus, all existing data suggest that  
133 MSL10 is a multifunctional MS ion channel that is capable of mediating adaptation to hypoosmotic  
134 shock in the short-term (reducing pressure by releasing osmolytes) and of signaling to change  
135 cellular state in the long-term (inducing cell death in response to biotic or abiotic stress). However,  
136 more structural information about MSL proteins and their pore-forming region is required to fully  
137 and directly test the possibility that MSL10 has a non-conducting function.

138  
139 To gain additional information about the structure of the channel pore, the mechanism of gating,  
140 and how ion flux through the channel is related to its genetic functions, we used mutational analysis  
141 and single-channel patch-clamp electrophysiology to identify residues in the presumptive pore-  
142 lining domain of MSL10 that are important for channel function, including tension sensitivity,  
143 conductivity, and stability of the open state. We then tested two tension-insensitive mutants for the  
144 ability to induce cell death in a previously established transient expression assay. These data  
145 provide critical information about the structural component of tension-sensitive ion transport, and  
146 a useful comparison to *EcMscS* and other MS channels in animals and bacteria. In addition, these  
147 mutant MSL10 channels provide tools for studying the relationship between tension sensitivity,  
148 open state stability, ion flux, and cell death signaling.

149

150 **RESULTS**

151

152 **Selection of potential pore-disrupting residues.** To identify residues likely to be important for  
 153 MSL10 ion channel activity, we performed a sequence alignment between the region of highest  
 154 homology between *EcMscS*, MSL10 and MSL8 (Figure 1A). In the *EcMscS* crystal structure, this  
 155 sequence forms transmembrane (TM) helix 3, the domain that lines the channel pore<sup>54</sup>. *EcMscS*  
 156 TM3 is 33 amino acids long and has a pronounced kink at G113 that splits it into TM3a and TM3b.  
 157 The analogous sequence in MSL10 is its most C-terminal TM helix, TM6. We therefore generated  
 158 a hypothetical structure of TM6 using the I-TASSER prediction server<sup>22</sup> and the *EcMscS* closed  
 159 state crystal structure (2OAU:A,<sup>56</sup>) as a template (Figure 1B). These data, along with a topology  
 160 prediction from the ARAMEMNON server<sup>22,57</sup>, support the overall topology for MSL10 shown  
 161 in Figure 1C. Based on this alignment, we identified four key classes of residues within the TM6  
 162 sequence that were likely to contribute to MSL10 channel function: 1) multiple phenylalanine  
 163 residues, 2) the putative glycine kink, 3) several nonpolar TM6 residues that differ between  
 164 MSL10 and MSL8, and 4) an isoleucine residue known to play a role in MSL8 function. Those  
 165 residues selected for study are indicated with circles in Figure 1A.

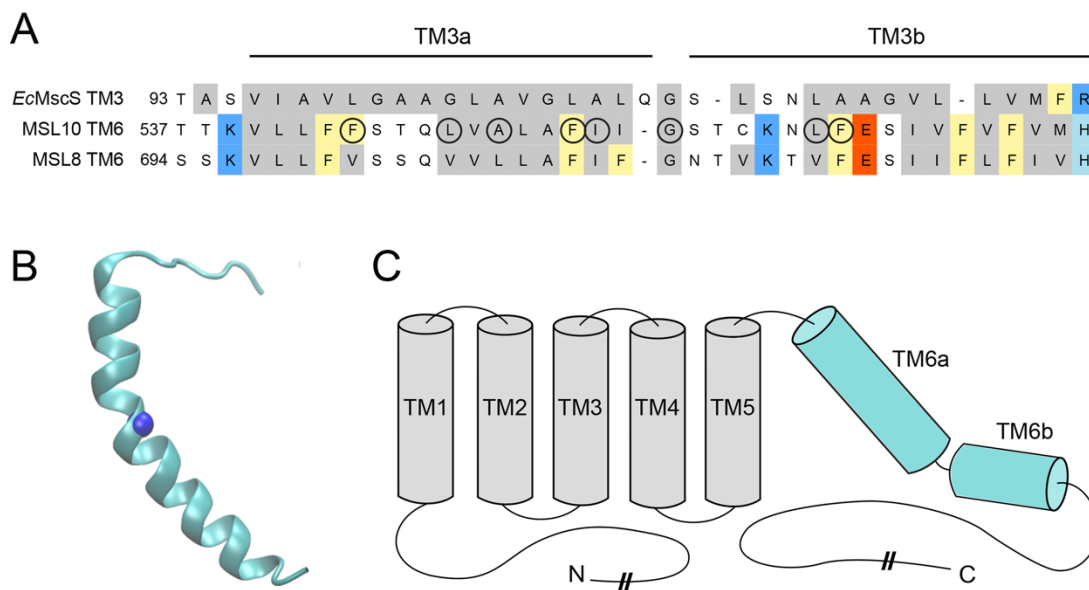

Figure 1. Identification of potential pore-disrupting residues in MSL10. (A) Alignment of the pore-lining domain of *E. coli* MscS and corresponding regions of *A. thaliana* MSL10 and MSL8. Acidic residues are indicated in red; basic residues in blue; and nonpolar in grey. Phe residues are marked yellow. Circles indicate residues that were analyzed in this report. (B) Side view of the predicted structure of the MSL10 TM6, created with I-TASSER. The side chain at G556, predicted to form a kink, is indicated with a blue sphere. (C) Predicted topology of MSL10, indicating soluble N- and C-termini and six membrane-spanning helices. The length of the N- and C-termini are not to scale.

166

167 **Phenylalanine 553 maintains channel conductance and the stability of the open state.** One  
168 distinction between the amino acid sequences of *EcMscS* TM3 and MSL10 TM6 is the presence  
169 or absence of multiple phenylalanine residues. *EcMscS* TM3 contains only one Phe residue, and  
170 it is located at very end of TM3b. MSL10 has six Phe residues scattered through the pore-lining  
171 domain. MSL8 has six Phe residues in its TM6; five of these are conserved with MSL10 (indicated  
172 in yellow, Figure 1C), and F720 is essential for channel function<sup>58</sup>. To determine if Phe residues  
173 in TM6 are also critical for MSL10 channel function, we used site-directed mutagenesis to change  
174 F544, F553, and F563 to smaller nonpolar residues. We introduced F544V, F553W, F553L,  
175 F553V, and F563L lesions into the MSL10 coding sequence of pOO2-MSL10-GFP, and pOO2-  
176 MSL10 for in vitro capped RNA (cRNA) production<sup>53</sup>. cRNA for all variants was injected into  
177 *Xenopus oocytes* for expression and characterization as previously described<sup>43</sup>.

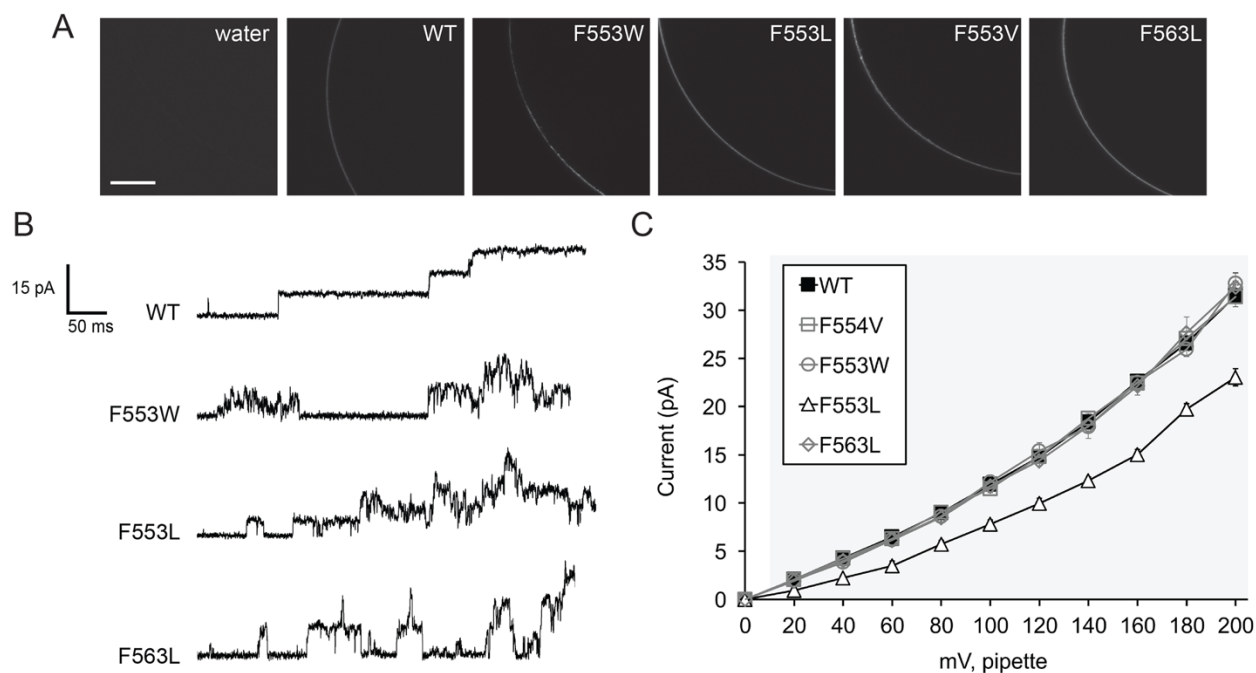

Figure 2. Mutagenesis of two TM6 phenylalanines reveals a role for bulky nonpolar residues in maintaining channel conductance and the stability of the open state. (A) Portions of the oocyte periphery 5 days after injection with the indicated MSL10-GFP variant cRNA. Scale bar is 100  $\mu\text{m}$ . (B) Examples of traces at -100 mV membrane potential. 0.5 second fragments of 5 s records of channel activation by symmetric pressure ramps are shown. (C) Current/voltage curves for the indicated MSL10 variants. Each data point is the average current from 3-9 patches in 60 mM  $\text{MgCl}_2$ , 4 mM HEPES. Error bars indicate standard deviation but are obscured by the symbols. Grey background indicates voltages where the current produced by MSL10 F553L differed significantly from wild type MSL10,  $p < 0.001$  (Student's t-test).



179 To determine if these lesions affected protein folding or stability, we monitored the trafficking of  
180 MSL10 variants fused to GFP by confocal microscopy. All variants produced similar signal at the  
181 oocyte periphery 5 days after injection, while no signal was present in water-injected oocytes  
182 (Figure 2A). Single channel patch-clamp electrophysiology was then used to assess the channel  
183 behavior (voltage-dependent conductance, open state stability, and tension-sensitivity) of each of  
184 these MSL10 variants, as in <sup>59</sup>. Current traces from excised inside-out patches derived from  
185 oocytes expressing wild type MSL10 showed the expected stable single channel openings ( $119.4$   
186  $\pm 4.0$  pS at  $-100$ mV, Figure 2B, top). MSL10 F544V did not appear different from the WT.  
187 However, MSL10 F553W, MSL10 F553L, and MSL10 F563L exhibited “flickery” channel  
188 activity, defined here as rapid increases and decreases in conductance without a clear time spent  
189 in the open state (middle and bottom, Figure 2B). We were unable to detect any channel activity  
190 in oocytes expressing MSL10 F553V.

191  
192 We measured the unitary currents produced by MSL10 and MSL10 Phe variant channels under  
193 transmembrane voltage from 0 to  $-200$  mV. The unitary conductances of MSL10 F544V ( $114.8 \pm$   
194  $4.0$  pS), F553W ( $121.8 \pm 4.3$  pS) and F563L ( $117.7 \pm 5.4$  pS), calculated at  $-100$  mV membrane  
195 potential, were indistinguishable from wild type MSL10 (Figure 2C, Table 1). However, MSL10  
196 F553L produced single-channel currents that were significantly lower than that of the wild type at  
197 every voltage tested (Figure 2C), and its conductance at  $-100$ mV was  $78.0 \pm 4.4$  pS, 0.6-fold that  
198 of the wild type (Table 1). As noted above, MSL10 F553V did not produce any activity. Thus,  
199 successively reducing the bulkiness of residues at position 553 resulted in successively lower  
200 unitary channel conductance (W $\approx$ F >L>V). We conclude that F553 and F563 both play important  
201 roles in maintaining the stability of the open state of MSL10, while F553 also controls channel  
202 conductance.

203  
204 ***Glycine 556 is a key residue for MSL10 channel function.*** The next residue in MSL10 we chose  
205 to investigate was G556. MSL10 G556 aligns with the kink-forming residue G113 in *EcMscS*  
206 (Figure 1A) and is predicted to sit at a similar kink in TM6 (Figure 1B). To determine if G556  
207 plays a role in MSL10 channel function, we changed this residue to the larger nonpolar residues  
208 alanine (G556A) or valine (G556V). While both MSL10 variants were expressed in *Xenopus*  
209 oocytes and trafficked normally to the plasma membrane (Figure 3A), neither functioned like the

210 wild type. The MSL10 G556A mutant was active and produced a relatively stable channel opening  
211 (Figure 3B). However, it had a unitary conductance of  $106.0 \pm 4.4$  pS, 0.9-fold that of the wild  
212 type channel (Figure 3C). MSL10-G556V did not produce any activity even under extreme  
213 membrane tensions and high membrane potentials. Thus, the G556A substitution produced a  
214 modest effect, and G556V completely ablated function, presumably because of increasing size of  
215 the side chains. These results establish that G556 plays a key role in the function of MSL10 and  
216 are consistent with the prediction that there is bending at this residue within the helix and that  
217 mobility at this site is important for the conformational changes associated with channel opening.

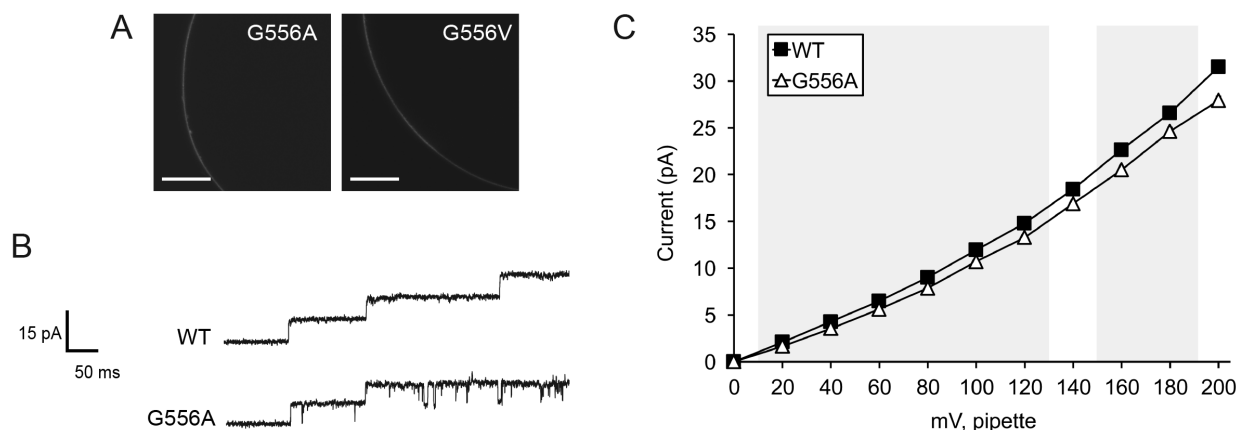

Figure 3. Replacing G556 with larger nonpolar residues reduces or ablates channel conductance. (A) Portions of the oocyte periphery 5 days after injection with the indicated MSL10-GFP variant cRNA. Scale bar is 100 μm. (B) Examples of traces at -100 mV membrane potential. 0.5 second fragments of 5 s records of channel activation by symmetric pressure ramps are shown. (C) Current/voltage curves for wild type and MSL10 G556A. Each data point is the average current from 3-9 patches in 60 mM MgCl<sub>2</sub>, 4 mM HEPES. Error bars indicating standard deviation are present but are obscured by the symbols. Wild type MSL10 curve is from the same data as in Figure 2C. Grey background indicates voltages where the current produced by MSL10 G556A differed significantly from wild type MSL10,  $p < 0.001$  (Student's t-test).

218 ***Nonpolar TM6 residues that differ between MSL10 and MSL8 are not required for wild-type***  
219 ***conductance and open state stability.*** Nonpolar residues in MSL10 TM6 that are not conserved in  
220 MSL8 include F544, L548, A550, I555 and L562. To determine if these residues confer the  
221 differences in conductance and tension sensitivity between MSL10 and MSL8, we changed several  
222 of these residues in MSL10 to the corresponding residue found in MSL8. MSL10 F544V was  
223 analyzed with other Phe substitutions in Figure 2 and did not appreciably affect MSL10 channel  
224 behavior. MSL10 L548V ( $114.3 \pm 5.0$  pS), MSL10 A550L ( $112.7 \pm 4.6$  pS) and MSL10 L562V  
225 ( $119.2 \pm 6.1$  pS) were also indistinguishable from the wild type ( $119.4 \pm 4.0$  pS) with respect to  
226 unitary conductance and open state stability (Figure 4 A and B, Table 1).

227  
228 **Changing Isoleucine 554 to Serine disrupts channel conductance and the stability of the open**  
229 **state.** We previously showed that MSL8 I711S produced a channel with wild type conductance  
230 but an increased tension threshold<sup>59</sup>. We mutated the corresponding residue in MSL10, I554, to  
231 valine and serine. While MSL10 I554V exhibited a wild type unitary conductance ( $121.8 \pm 8.1$   
232 pS) and gating pattern, MSL10 I554S was very flickery (Figure 4A), and had a significantly lower  
233 unitary conductance than WT ( $61.1 \pm 4.9$  pS compared to  $119.4 \pm 4.0$  pS of WT at -100 mV  
234 membrane potential, Figure 4 B). These unexpected results suggest that MSL10 I554S has normal  
235 tension sensitivity, but once open, has an unstable open state. Taken together, the data shown in  
236 Figure 4 suggest that the differences in MSL8 and MSL10 channel behavior cannot be easily  
237 attributed to individual amino acid residues within TM6.

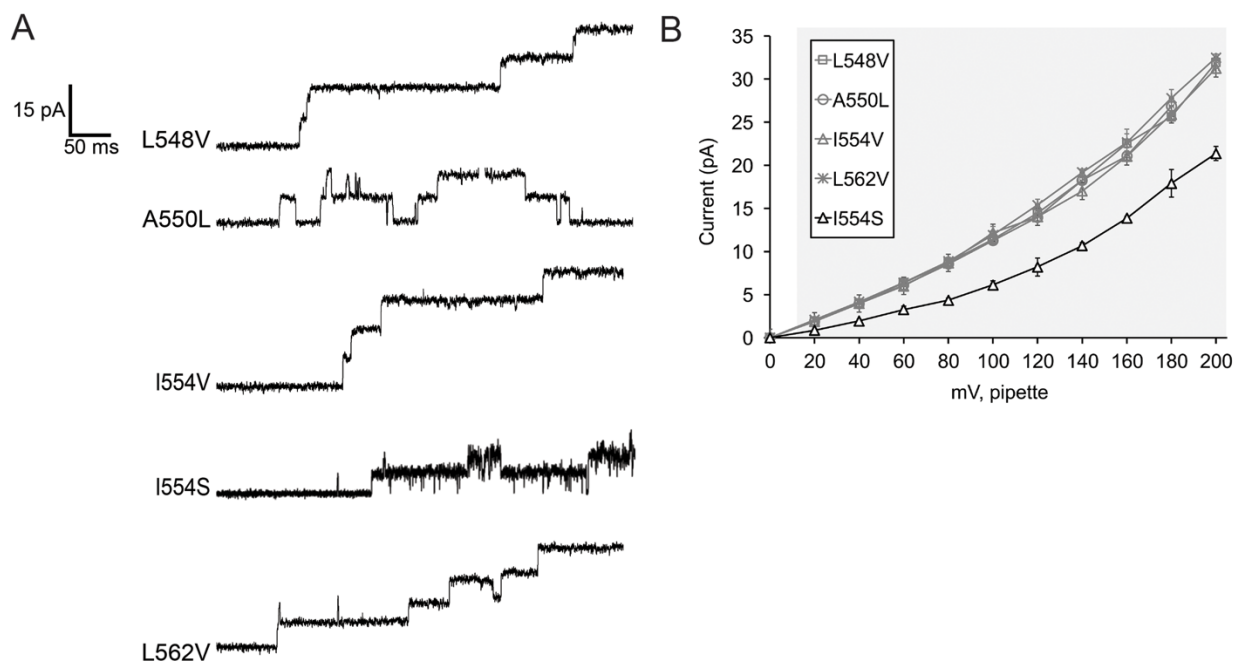

Figure 4 Effects of Mutating Nonpolar Residues in TM6 that Differ Between MSL8 and MSL10. (A) Examples of traces at -100 mV membrane potential. 0.5 second fragments of 5 s records of channel activation by symmetric pressure ramps are shown. (B) Current/voltage curves for the indicated MSL10 variants. Each data point is the average current from 3-9 patches in 60 mM MgCl<sub>2</sub>, 4 mM HEPES. Error bars indicate standard deviation. Grey background indicates voltages where the current produced by MSL10 I554S differed significantly from wild type MSL10,  $p < 0.001$  (Student's t-test).

238  
239 **Opening and/or closing tension sensitivities were altered in MSL10 F553L, L562V, F563L.** The  
240 established approach for measuring tension sensitivity of *EcMscS*, by calculating the activation

241 midpoint (e.g. <sup>53</sup>), is not possible with MSL10 expressed in oocytes, as one typically cannot reach  
 242 current saturation before the patch collapses <sup>28,52,60</sup>. Instead we measured the gating threshold, or  
 243 the amount of tension required to open the second channel in the patch. We used pipettes with the  
 244 same resistance ( $3.00 \pm 0.25$  MOhm) to reduce variability in patch size and geometry.

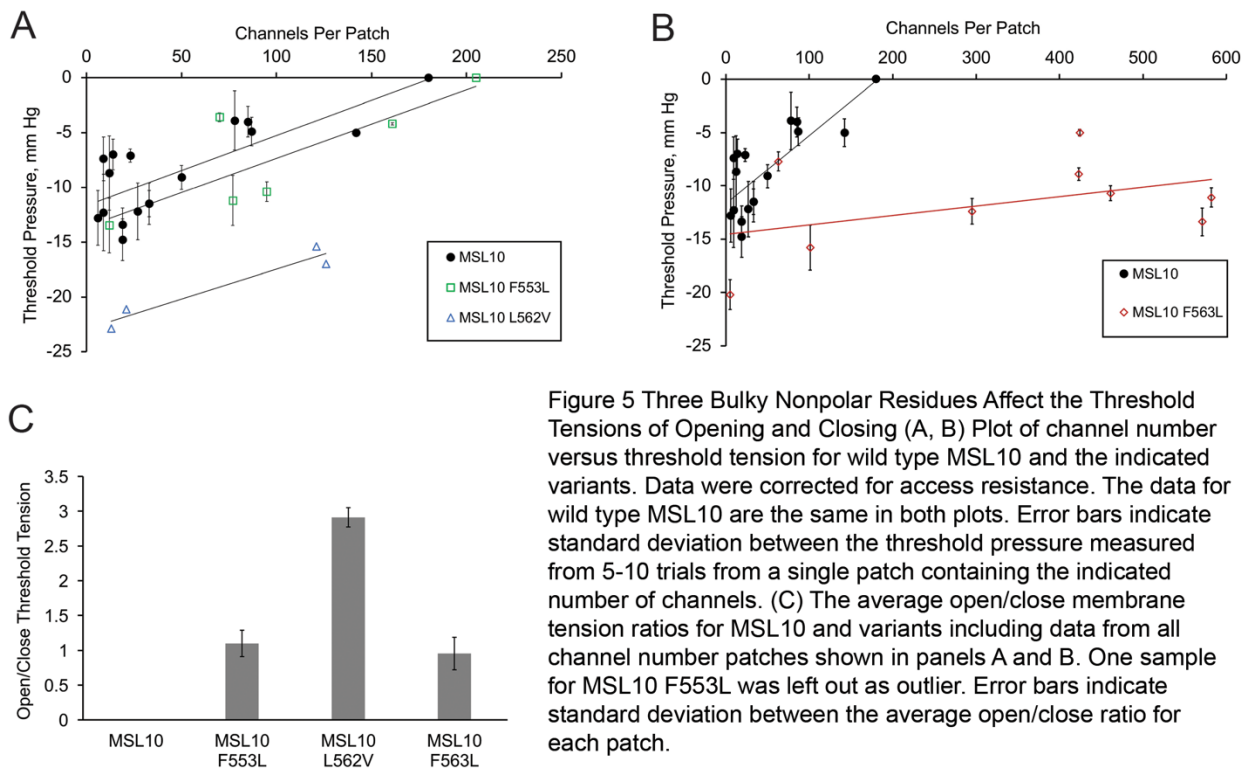

245 We first analyzed the gating threshold for wild type MSL10. We observed that the gating threshold  
 246 depended on the number of channels we observed in a patch prior to saturation or patch rupture,  
 247 and that patches with more channels had a lower opening threshold (Figure 5A). Assuming low  
 248 open probability, and minimal spontaneous gating at zero tension, these data can be fit to a line  
 249 with slope  $0.049 \pm 0.02$  channels/mm Hg (Figure 5A, circles). The same analyses for MSL10  
 250 F553L (squares) and MSL10 L562V (triangles) produced slopes similar to that of the wild type  
 251 channel,  $0.047 \pm 0.04$  and  $0.036 \pm 0.01$  channels/mm Hg respectively (Figure 5A). However,  
 252 MSL10 F563L did not show a strong dependence of channel number on threshold pressure, with  
 253 patches containing a range of channel numbers all opening at essentially the same tension. The  
 254 linear regression line slope for MSL10 F563L was only  $0.009 \pm 0.007$  channels/mm Hg (Figure  
 255 5B, diamonds). As shown in Figure 5B, we routinely observed very high channel numbers per  
 256 patch for MSL10 F563L in some cases as many as 600 channels per patch. Thus, some aspect of  
 257 channel-channel interaction may be altered in MSL10 F563L.  
 258

259

260 The fact that all three MSL10 variants had higher closing thresholds than wild type MSL10 made  
261 it possible to calculate an open/close ratio, using patches with 5-600 channels (Figure 5C). For  
262 MSL10 F563L, the open/close ratio was close to one ( $0.95 \pm 0.23$ ). MSL10 L562V had an  
263 open/close ratio of  $2.9 \pm 0.13$ . For MSL10 F553L, the open/close ratio was close to one ( $1.10 \pm$   
264  $0.19$ ) when only the 4 closest data points were considered. A fifth strongly outlying data point was  
265 not included, as its value exceeded the upper fence, as defined by the quartile method. To  
266 summarize, wild type MSL10 showed threshold pressure of around -15 mm Hg and exhibited  
267 hysteresis. MSL10 L562V had a high tension threshold for opening but maintained hysteresis.  
268 MSL10 F563L had a high tension threshold for both opening and closing and did not exhibit  
269 hysteresis. Due to the small sample size, we can only tentatively conclude that MSL10 F553L lost  
270 hysteresis.

271

272 ***MSL10 TM6 lesions that ablate channel function do not alter the ability of MSL10 to trigger***  
273 ***cell death signaling.*** These lesions that alter MSL10 channel behavior provide tools to test the  
274 structural requirements for MSL10's cell death signaling function. The two MSL10 lesions that  
275 produced no ion channel activity (F553V and G556V), along with wild type MSL10, were fused  
276 to GFP and transiently expressed under the strong constitutive Cauliflower Mosaic Virus 35S  
277 promoter (35Sp) in tobacco leaf epidermal cells as described previously<sup>43</sup>. Constructs were co-  
278 infiltrated with a plasmid expressing P19 in order to suppress gene silencing<sup>54</sup>. The As shown in  
279 Figure 6A, all MSL10 variants were expressed and trafficked normally in tobacco cells. Five days  
280 after Agrobacterium infiltration, leaf samples were dual stained for FDA and PI to assess cell death  
281 (Figure 6B). As expected, 35% of the cells in leaf samples expressing wild type full-length MSL10  
282 were dead, compared to 14% when P19 was infiltrated alone. Neither MSL10-F553V nor MSL10  
283 G556V produced levels of cell death that were statistically distinguishable from wild type MSL10  
284 (Figure 6C), indicating that ion channel function is not required for the ability of full length MSL10  
285 to trigger cell death in this transient assay.

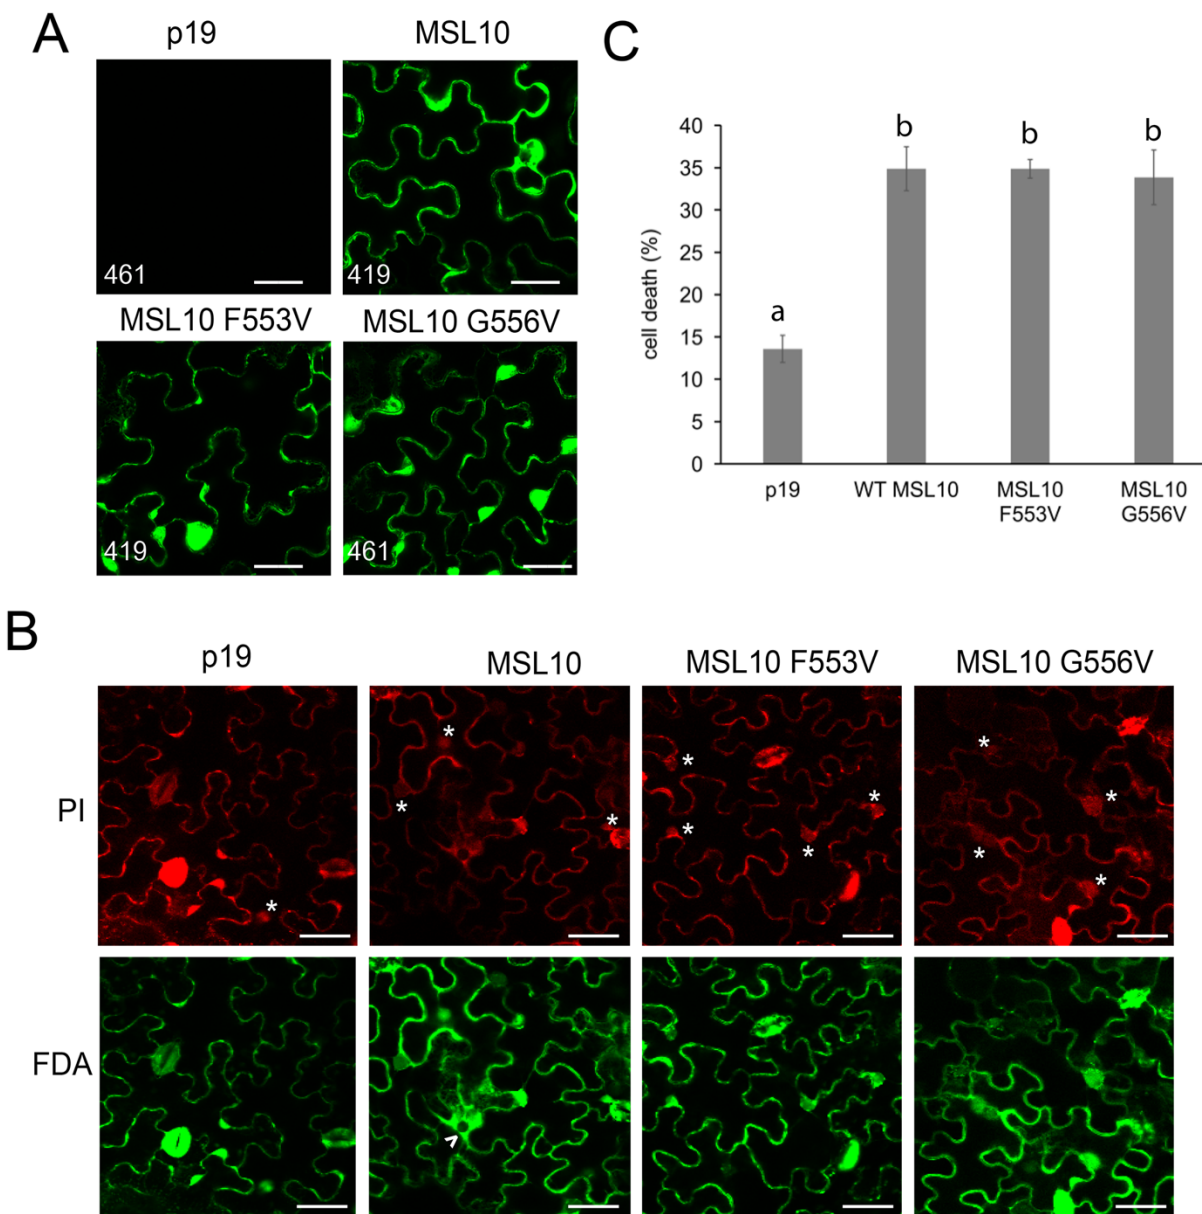

Figure 6. MSL10 Mechanosensitive channel activity is not required for death signaling in planta. (A) Localization of MSL10-GFP variants transiently expressed in tobacco epidermal pavement cells. Images were taken five days after infiltration. Infiltrations with P19 alone were used as a negative control. Scale bar is 40  $\mu$ m. Numbers in the left-hand corner indicate the voltage setting of the PMT detector when imaging. (B) Examples of cell viability assays. Tobacco leaves expressing MSL10-GFP variants were dual stained with FDA and PI; cells were scored as dead if they had a PI-stained nucleus (indicated by asterisks) or a disappearing vacuole, evidenced by spreading of cytoplasmic signal (arrowhead). Scale bar is 50  $\mu$ m. (C) Percentage of dead cells quantified from dual staining of 20 leaves (P19 and MSL10) or 10 leaves (MSL10 variants) from multiple infiltration experiments. Error bars indicate standard error. Statistical differences were assessed by One-way ANOVA and Scheffe's test; groups with the same letter (b) did not significantly differ from each other ( $p > 0.05$ ).

286

287

288

## 289 **Discussion**

290 Here we report the functional effect of twelve different point mutations in the mechanosensitive  
291 channel MscS-Like (MSL)10 from *Arabidopsis thaliana*. All substitutions were made in a set of  
292 eight non-polar amino acids located in the putative pore-lining transmembrane (TM) helix 6. We  
293 observed that four of these lesions (F544V, L548V, A550L, and I554V) did not detectably alter  
294 channel behavior in our assays, four primarily affected unitary conductance and/or open state  
295 stability (F553W, F553L, G556A, I554S), three affected tension sensitivity and/or hysteresis  
296 (F553L, L562V, and F563L), and two produced no mechanosensitive channel activity at all  
297 (F553V, G556V). Finally, we observed that the latter two variants were as capable as wild type  
298 MSL10 of inducing cell death in an *in planta* expression assay.

299  
300 Since Phe residues are found in TM6 of MSL8 and MSL10 but not in TM3 of *EcMscS*, they were  
301 reasonable candidates for residues that underlie the differing channel properties of MSLs and  
302 *EcMscS*. MSL10 has a smaller conductance than *EcMscS*, and we originally hypothesized that  
303 these bigger hydrophobic residues found in the MSL10 TM6 could form a “vapor lock”, like  
304 *EcMscS* L105 and L109<sup>22,61</sup>, or partially obstruct the channel pore as suggested for F450 in the  
305 *Arabidopsis* SLAC1 channel<sup>62</sup>. In this case, replacing Phe with smaller side chains such as Leu or  
306 Val would lead to a deregulated or constitutively open channel. Alternatively, bulky Phe residues  
307 could be involved in the slow closing kinetics observed in MSL10 but not in MscS if they  
308 participated in a hydrophobic residue-mediated force transduction pathway from the periphery of  
309 the channel to its pore, in a manner analogous to the proposed force-transmitting clutch of *EcMscS*  
310<sup>32</sup>. However, none of these hypotheses were correct. Instead, our data suggest that the large  
311 hydrophobic nature of the Phe residues at 553 and 563 facilitate the unitary conductance and the  
312 stability of the open state of MSL10.

313  
314 While mutation of F553 to tryptophan had no significant effect on conductance, mutation to  
315 leucine led to a decrease in unitary conductance and mutation to valine produced a channel without  
316 any apparent mechanosensitive response (Figure 2). Because MSL10 F553L produced a partially  
317 functional channel, and because MSL10 F553V was expressed at wild-type levels, MSL10 F553V  
318 is likely to produce a stable oligomeric channel that lacks conductive pore. We thus speculate that  
319 the pore size of MSL10 is altered by the size of the side chain at F553; as the side chains at F553

320 decrease in size, pore-lining domains grow more and more closely packed, thus successively  
321 reducing conductance.

322  
323 While gating pressures for the Phe mutants did not significantly differ from those of WT, both  
324 MSL10 F553L and MSL10 F563L showed almost no hysteresis (Figure 5C). MSL10 typically  
325 shows delayed closing relative to opening kinetics; with MSL10 F553L and MSL10 F563L, the  
326 ratio of opening and closing tensions were close to 1. This suggested that these mutant channels  
327 have an open state that transitions back to the closed state more easily than the wild type channel.  
328 The flickery behavior of MSL10 F553L may be explained by a steric mismatch between the  
329 mutated residue and its interaction partner from the adjacent pore-lining domain. Lack of any  
330 channel activity for the F553V mutant may indicate insufficient size of the non-polar side chain  
331 for creating even partially open pore. We speculate that the open state is stabilized by interaction  
332 between F553 and another hydrophobic residue from the adjacent pore-lining domain of the  
333 channel. Taken together, the data shown in Figure 2 show that multiple Phe residues in MSL10  
334 TM6 are required for the size and stability of the open pore.

335  
336 We also found that G556 plays a critical role in MSL10 channel function. We first targeted G556  
337 for mutation because glycine at a similar position in *EcMscS* TM3 (G113) has been implicated in  
338 gating movements through crystal structures and molecular dynamics. The *EcMscS* G113A lesion  
339 prevents channel inactivation, presumably by preventing the helix kinking thought to accompany  
340 MscS entry from the open state into the inactivated state<sup>16,17</sup>. While MSL10 does not show  
341 inactivation in oocytes (though it does in plant cells<sup>63</sup>), the model for MSL10 TM6 shown in  
342 Figure 1 suggests a similar geometry and is consistent with a similar gating movement in the pore-  
343 lining helix between MscS and MSL10. We therefore hypothesized that lesions at this site might  
344 affect the conformational changes required for channel gating.

345  
346 While MSL10 G556A showed only a subtle difference from the wild type—a small, but  
347 statistically significant, decrease in conductance—MSL10 G556V did not produce any  
348 mechanosensitive activity at any applied tensions, though the mutant was expressed at WT levels  
349 (Figure 3). We speculate here that the MSL10 G556 side chain faces the pore lumen in the open  
350 state and therefore introduction of alanine at position 556 resulted in decrease of unitary currents



351 (Figures 3B, C). Introduction of the even bigger hydrophobic residue valine at this site might then  
352 either fully occlude the channel pore, or prevent the conformational changes associated with  
353 channel gating. Whether the same movements are made during the gating transition of *EcMscS*  
354 and MSL10 is not clear and will certainly require additional experimentation, but the fact that the  
355 G556 is a key structural feature of MSL10 TM6 is established.

356  
357 We addressed the similarities and differences between MSL10 and its close homolog MSL8. We  
358 first attempted to link the difference in MSL8 and MSL10 channel characteristics to the differences  
359 in the sequence of their putative pore-lining domains. We mutated 3 residues of MSL10 into their  
360 counterpart in MSL8, generating MSL10 L548V, A550L, and L562V. Only the latter had any  
361 effect; MSL10 L562V had a high gating threshold (Figure 5A), similar to that previously observed  
362 with MSL8<sup>44</sup>. Thus, L562/V719 may in part be responsible for the difference between MSL8 and  
363 MSL10 with respect to tension sensitivity.

364  
365 We also made mutations in residues conserved between MSL8 and MSL10 that have known  
366 effects on MSL8 function. MSL8 I711S exhibited normal conductance but an increased gating  
367 threshold and MSL8 F720L was a completely disrupted channel<sup>53</sup>. Both lesions altered MSL10  
368 function, but they did not produce the same effects they did in MSL8. MSL10 I554S (aligns with  
369 MSL8 I711) produced a flickery channel with half the conductance of the wild type, while MSL10  
370 F563L (aligns with MSL8 F720) produced a channel with normal conductance but a high gating  
371 threshold. These unexpected results suggest that local or global differences in structure dictate the  
372 characteristics of these two channels, so trying to identify individual residues responsible for  
373 particular channel characteristics may not be successful.

374  
375 Residues L562 and F563 form a hydrophobic patch flanked by polar and charged residues (Figure  
376 1A) and our experiments indicate that they are essential for normal tension sensitivity and gating  
377 kinetics of the MSL10 channel (Figure 5). Hysteresis is the strongest in WT MSL10, wherein the  
378 threshold tension for closing is much lower than for opening. The difference between opening and  
379 closing tensions was decreased in MSL10 F562V, and completely abolished in MSL10 F563L  
380 (Figure 5C). We speculate that these two residues may function as a “force transmitters”, similar  
381 to L111 of *EcMscS* TM3. It has been proposed that L111 interacts with F68 from TM2, enabling

382 transduction of the membrane tension into a gating force <sup>32</sup>. Similarly, L562 and F563 residues  
383 may be part of an intra-transmembrane helix system that serves to control the closing kinetics of  
384 MSL10 by stabilizing the open state.

385  
386 The concept that ion channels have functions separable from their ability to mediate ion flux (non-  
387 conducting functions) is not new, and has been established for sodium and potassium channels in  
388 animal systems <sup>64,65</sup>. However, non-conducting functions have not been previously demonstrated  
389 for MS ion channels. We previously established that MSL10 is capable of inducing cell death when  
390 overexpressed in stable Arabidopsis lines or in transient tobacco expression experiments <sup>54</sup>. This  
391 effect was modulated by seven phosphorylation sites in the soluble N-terminus, but these sites did  
392 not alter ion channel function, suggesting that the two functions might be separable. Transient  
393 overexpression of the soluble N-terminus of MSL10 was capable triggering programmed cell death  
394 on its own. However, these results left open the possibility that MSL10 ion channel function is  
395 required indirectly in order to activate the cell death signaling mediated by the N-terminus, and  
396 that this effect could be simulated by expressing the truncated, soluble N-terminus.

397  
398 Two of the twelve lesions we tested, MSL10 F553V and MSL10 G556V, were normally expressed  
399 and trafficked in *Xenopus* oocytes but did not exhibit any mechanosensitive ion channel activity  
400 (Figures 2 and 3). These mutants provided the opportunity to test the idea of a non-conducting  
401 function for MSL10 more directly and without the caveats of the truncation experiment. The effect  
402 of overexpressing these mutant channels did not differ in any way from the wild type, indicating  
403 that MS ion channel activity is not required for MSL10's ability to induce cell death in tobacco  
404 epidermal cells. The results presented here now firmly establish that MSL10 induces programmed  
405 cell death through a mechanism independent of mechanically-induced ion flux. A key future  
406 experiment will be to determine if the non-conducting function of MSL10 is regulated by  
407 membrane tension. It will also worth testing if non-conducting functions are a conserved feature  
408 of proteins in the MscS family, as suggested by a report that the soluble C-terminus of MscS  
409 interacts with the bacterial fission protein FtsZ <sup>66</sup>.

410  
411

412 **Methods**

413

414 **Molecular biology.** All constructs were based on pOO2-MSL10<sup>43</sup>. Site-directed mutagenesis was  
415 used to introduce point mutations into the *MSL10* sequence and confirmed by sequencing. Capped  
416 cRNA was transcribed *in vitro* with SP6 polymerase using the mMessenger mMachine kit  
417 (Ambion, Thermo Fisher Scientific) and stored at -80°C at approximately 1000 ng/μl.

418

419 **Oocyte preparation.** *Xenopus laevis* oocytes (Dumont stage V or VI) were purchased (Ecocyte  
420 Bioscience US LLC, Austin, Texas) and handled as described<sup>59</sup>. Oocytes were injected with 50 nl  
421 of 1000 ng/μl of RNA the day after isolation. Fluorescent imaging of the oocytes was carried out  
422 48-72 hours after injection. Briefly, the oocytes were placed on concaved slides and covered with  
423 coverslips. Confocal imaging of the periphery of the oocytes was performed using Olympus  
424 Fluoview 1000 with BX61 microscope and the Olympus FV10-ASW software suite.

425

426 **Electrophysiology.** The buffer used was 60 mM MgCl<sub>2</sub>, 5 mM HEPES, adjusted to pH 7.38 with  
427 TEA-OH. All the traces presented were obtained from excised inside-out patches. Data were  
428 acquired using Axopatch 200B amplifier and Digidata 1440A digitizer (Molecular Devices) at 20  
429 kHz and low-pass filtered at 5 kHz. Channels were activated by symmetric 5-second pressure  
430 ramps. Pressure was applied and monitored with a HSPC-1 high speed pressure clamp system  
431 (ALA Scientific Instruments), and traces analyzed with Clampfit 10.6 (Molecular Devices). The  
432 gating threshold of a channel variant was defined as the pressure at which the second channel of  
433 the population in a patch opened. For each patch, several pressure ramps of -30 mmHg were run  
434 to accommodate for patch creep. Only after that, measurements at -20 mV membrane were  
435 performed. For each patch the results of 7-12 consecutive pulls were averaged. The number of  
436 channels per patch was estimated from the peak current at patch rupturing pressure. In cases when  
437 the number of open channels was 100 or more, the correction for series pipette resistance was  
438 introduced. For closing pressures, the average was taken only in cases when closing pressure was  
439 not zero. In case when at least one pull for a patch resulted in at least one open channel after the  
440 pressure was released, the closing pressure was considered to be zero.

441

442 **Software.** The putative structure of *AtMSL10* TM6 (Fig. 1B) was obtained from the I-TASSER  
443 prediction server<sup>56</sup> using the *EcMscS* closed state crystal structure (2OAU:A,<sup>22,57</sup>) as a template.  
444 Sequence alignments and analysis were made using Unipro UGENE bioinformatics toolkit<sup>67</sup>.  
445 Visualization of crystal structures and imaging of the putative *AtMSL10* pore region were  
446 performed in VMD suite<sup>68</sup>. Secondary structure of *AtMSL10* was predicted using ARAMEMNON  
447 plant membrane protein database<sup>58</sup>.

448

449 **Cell death assays.** The coding sequences of wild type *MSL10*, *MSL10* F553V, and *MSL10*  
450 G556V were amplified from the pOO2 vectors describe above and cloned into the pK7FWG2  
451 vector for C-terminal GFP tagging and transient expression in *Nicotiana benthamiana* leaves under  
452 the control of the 35S promoter. In order to quantify the amount of dead versus viable epidermal  
453 pavement cells, leaves were dual stained with fluorescein diacetate (FDA) and propidium iodide  
454 (PI) five days after infiltration as described in<sup>69</sup> and visualized via confocal microscopy. As  
455 previously outlined, cells were considered dead 1) if their nucleus was stained by PI and/or 2) their  
456 vacuole disappeared, which is apparent when cytoplasmic FDA/GFP signal fills the entire body of  
457 the pavement cell<sup>54</sup>. In this study, we added a third criterion whereby cells were also considered  
458 dead if their vacuole had significantly, though not completely, disappeared. The % cell death  
459 reported was the average of four separate infiltration experiments, each consisting of three to four  
460 leaves per construct, with n ~ 60 cells imaged per leaf.

461

#### 462 **Author Contributions**

463 GM, JMS and ESH designed experiments and wrote the paper; GM, JMS and SO performed  
464 experiments.

465

#### 466 **Acknowledgments**

467 We acknowledge Debarati Basu for generating the mutant *MSL10* constructs used in Figure 6.  
468 These experiments were funded by the National Institutes of Health grant R01GM084211 (to  
469 ESH), National Science Foundation grant MCB1253103 (to ESH) and NSF Graduate Research  
470 Fellowship DGE-1745038 (to JMS).

471

#### 472 **Figure Legends**

473

474 **Figure 1. Identification of potential pore-disrupting residues in MSL10.** (A) Alignment of the  
475 pore-lining domain of *E. coli* MscS and corresponding regions of *A. thaliana* MSL10 and MSL8.  
476 Acidic residues are indicated in red; basic residues in blue; and nonpolar in grey. The residues are  
477 marked yellow. Circles indicate residues that were analyzed in this report. (B) Side view of the  
478 predicted structure of the MSL10 TM6, created with I-TASSER. The side chain at G556, predicted  
479 to form a kink, is indicated with a blue sphere. (C) Predicted topology of MSL10, indicating  
480 soluble N- and C-termini and six membrane-spanning helices. The length of the N- and C-termini  
481 are not to scale.

482

483 **Figure 2. Mutagenesis of two TM6 phenylalanines reveals a role for bulky nonpolar residues**  
484 **in maintaining channel conductance and the stability of the open state.** (A) Portions of the  
485 oocyte periphery 5 days after injection with the indicated MSL10-GFP variant cRNA. Scale bar is  
486 100  $\mu\text{m}$ . (B) Examples of traces at -100 mV membrane potential. 0.5 second fragments of 5 s  
487 records of channel activation by symmetric pressure ramps are shown. (C) Current/voltage curves  
488 for the indicated MSL10 variants. Each data point is the average current from 3-9 patches in 60  
489 mM  $\text{MgCl}_2$ , 4 mM HEPES. Error bars indicate standard deviation but are obscured by the symbols.  
490 Grey background indicates voltages where the current produced by MSL10 F553L differed  
491 significantly from wild type MSL10,  $p < 0.001$  (Student's t-test).

492

493 **Figure 3. Replacing G556 with larger nonpolar residues reduces or ablates channel**  
494 **conductance.** (A) Portions of the oocyte periphery 5 days after injection with the indicated  
495 MSL10-GFP variant cRNA. Scale bar is 100  $\mu\text{m}$ . (B) Examples of traces at -100 mV membrane  
496 potential. 0.5 second fragments of 5 s records of channel activation by symmetric pressure ramps  
497 are shown. (C) Current/voltage curves for wild type and MSL10 G556A. Each data point is the  
498 average current from 3-9 patches in 60 mM  $\text{MgCl}_2$ , 4 mM HEPES. Error bars indicating standard  
499 deviation are present but are obscured by the symbols. Wild type MSL10 curve is from the same  
500 data as in Figure 2C. Grey background indicates voltages where the current produced by MSL10  
501 G556A differed significantly from wild type MSL10,  $p < 0.001$  (Student's t-test).

502

503 **Figure 4 Effects of Mutating Nonpolar Residues in TM6 that Differ Between MSL8 and**  
504 **MSL10. (A)** Examples of traces at -100 mV membrane potential. 0.5 second fragments of 5 s  
505 records of channel activation by symmetric pressure ramps are shown. **(B)** Current/voltage curves  
506 for the indicated MSL10 variants. Each data point is the average current from 3-9 patches in 60  
507 mM MgCl<sub>2</sub>, 4 mM HEPES. Error bars indicate standard deviation. Grey background indicates  
508 voltages where the current produced by MSL10 I554S differed significantly from wild type  
509 MSL10,  $p < 0.001$  (Student's t-test).

510  
511 **Figure 5 Three Bulky Nonpolar Residues Affect the Threshold Tensions of Opening and**  
512 **Closing (A, B)** Plot of channel number versus threshold tension for wild type MSL10 and the  
513 indicated variants. Data were corrected for access resistance. The data for wild type MSL10 are  
514 the same in both plots. Error bars indicate standard deviation between the threshold pressure  
515 measured from 5-10 trials from a single patch containing the indicated number of channels. **(C)**  
516 The average open/close membrane tension ratios for MSL10 and variants including data from all  
517 channel number patches shown in panels A and B. One sample for MSL10 F553L was left out as  
518 outlier. Error bars indicate standard deviation between the average open/close ratio for each patch.

519  
520 **Figure 6. MSL10 Mechanosensitive channel activity is not required for death signaling in**  
521 ***planta*. (A)** Localization of MSL10-GFP variants transiently expressed in tobacco epidermal  
522 pavement cells. Images were taken five days after infiltration. Infiltrations with P19 alone were  
523 used as a negative control. Scale bar is 40  $\mu\text{m}$ . Numbers in the left-hand corner indicate the voltage  
524 setting of the PMT detector when imaging. **(B)** Examples of cell viability assays. Tobacco leaves  
525 expressing MSL10-GFP variants were dual stained with FDA and PI; cells were scored as dead if  
526 they had a PI-stained nucleus (indicated by asterisks) or a disappearing vacuole, evidenced by  
527 spreading of cytoplasmic signal (arrowhead). Scale bar is 50  $\mu\text{m}$ . **(C)** Percentage of dead cells  
528 quantified from dual staining of 20 leaves (P19 and MSL10) or 10 leaves (MSL10 variants) from  
529 multiple infiltration experiments. Error bars indicate standard error. Statistical differences were  
530 assessed by One-way ANOVA and Scheffe's test; groups with the same letter (b) did not  
531 significantly differ from each other ( $p > 0.05$ ).

532

533

|                          | <b>Lesion</b> | <b>Conductance at -100mV</b> | <b>Open state</b> | <b>Gating Characteristics</b>          | <b>Cell Death</b> |
|--------------------------|---------------|------------------------------|-------------------|----------------------------------------|-------------------|
| <b>MSL10 WT</b>          | none          | 119.4 ± 4.0 pS               | Stable            | Strong hysteresis                      | strong            |
|                          |               |                              |                   |                                        |                   |
| <b>Phe Residues</b>      | F544V         | 114.8 ± 4.0 pS               | Stable            |                                        |                   |
|                          | F553W         | 121.8 ± 4.3 pS               | Slight flicker    |                                        |                   |
|                          | F553L         | 78.0 ± 4.4 pS                | Slight flicker    | No hysteresis                          |                   |
|                          | F553V         | N/A                          | N/A               | N/A                                    | strong            |
|                          | F563L         | 117.7 ± 5.4 pS               | Stable            | High gating threshold<br>No hysteresis |                   |
|                          |               |                              |                   |                                        |                   |
| <b>Putative Gly kink</b> | G556A         | 106.0 ± 4.4 pS               | Stable            |                                        |                   |
|                          | G556V         | N/A                          | N/A               | N/A                                    | strong            |
|                          |               |                              |                   |                                        |                   |
| <b>Change to MSL8</b>    | L548V         | 114.3 ± 5.0 pS               | Stable            |                                        |                   |
|                          | A550L         | 112.7 ± 4.6 pS               | Stable            |                                        |                   |
|                          | L562V         | 119.2 ± 6.1 pS               | Stable            | High gating threshold                  |                   |
|                          | I554V         | 121.8 ± 8.1 pS               | Stable            |                                        |                   |
|                          | I554S         | 61.1 ± 4.9 pS                | Flickery          |                                        | strong            |

534 **Table 1.** Properties of the *AtMSL10* TM6 mutants. Conductance at -100mV.

535

536

537

538

539

## 540 **References**

- 541 1. Anishkin A, Loukin SH, Teng J, Kung C. Feeling the hidden mechanical forces in lipid  
542 bilayer is an original sense. *Proc Natl Acad Sci USA*. 2014;111(22):7898-7905.  
543 doi:10.1073/pnas.1313364111.
- 544 2. Booth IR, Miller S, Müller A, Lehtovirta-Morley L. The evolution of bacterial  
545 mechanosensitive channels. *Cell Calcium*. 2015;57(3):140-150.  
546 doi:10.1016/j.ceca.2014.12.011.
- 547 3. Bavi N, Nikolaev YA, Bavi O, et al. Principles of Mechanosensing at the Membrane  
548 Interface. In: *The Biophysics of Cell Membranes*. Vol 19. Springer Series in Biophysics.  
549 Singapore: Springer Singapore; 2017:85-119. doi:10.1007/978-981-10-6244-5\_4.
- 550 4. Ranade SS, Syeda R, Patapoutian A. Mechanically Activated Ion Channels. *Neuron*.  
551 2015;87(6):1162-1179. doi:10.1016/j.neuron.2015.08.032.
- 552 5. Basu D, Haswell ES. Plant mechanosensitive ion channels: an ocean of possibilities.  
553 *Current Opinion in Plant Biology*. 2017;40:43-48. doi:10.1016/j.pbi.2017.07.002.
- 554 6. Martinac B, Nomura T, Chi G, et al. Bacterial mechanosensitive channels: models for  
555 studying mechanosensory transduction. *Antioxid Redox Signal*. 2014;20(6):952-969.  
556 doi:10.1089/ars.2013.5471.
- 557 7. Gu Y, Gu C. Physiological and pathological functions of mechanosensitive ion channels.  
558 *Mol Neurobiol*. 2014;50(2):339-347. doi:10.1007/s12035-014-8654-4.
- 559 8. Gottlieb PA, Suchyna TM, Ostrow LW, Sachs F. Mechanosensitive ion channels as drug  
560 targets. *Curr Drug Targets CNS Neurol Disord*. 2004;3(4):287-295.
- 561 9. Boulos RA. Antimicrobial dyes and mechanosensitive channels. *Antonie Van*  
562 *Leeuwenhoek*. 2013;104(2):155-167. doi:10.1007/s10482-013-9937-x.
- 563 10. Iscla I, Wray R, Blount P, et al. A new antibiotic with potent activity targets MscL. *J*  
564 *Antibiot*. 2015;68(7):453-462. doi:10.1038/ja.2015.4.
- 565 11. Sukharev S. Purification of the small mechanosensitive channel of Escherichia coli  
566 (MscS): the subunit structure, conduction, and gating characteristics in liposomes. *Biophys*  
567 *J*. 2002;83(1):290-298. doi:10.1016/S0006-3495(02)75169-2.
- 568 12. Martinac B, Buechner M, Delcour AH, Adler J, Kung C. Pressure-sensitive ion channel in  
569 Escherichia coli. *Proc Natl Acad Sci USA*. 1987;84(8):2297-2301.
- 570 13. Levina N, Töttemeyer S, Stokes NR, Louis P, Jones MA, Booth IR. Protection of  
571 Escherichia coli cells against extreme turgor by activation of MscS and MscL  
572 mechanosensitive channels: identification of genes required for MscS activity. *EMBO J*.  
573 1999;18(7):1730-1737. doi:10.1093/emboj/18.7.1730.



- 574 14. Maksaev G, Haswell ES. Recent characterizations of MscS and its homologs provide  
575 insight into the basis of ion selectivity in mechanosensitive channels. *Channels (Austin)*.  
576 2013;7(3):215-220. doi:10.4161/chan.24505.
- 577 15. Cox CD, Wann KT, Martinac B. Selectivity mechanisms in MscS-like channels: From  
578 structure to function. *Channels (Austin)*. 2014;8(1):5-12. doi:10.4161/chan.27107.
- 579 16. Boer M, Anishkin A, Sukharev S. Adaptive MscS gating in the osmotic permeability  
580 response in *E. coli*: the question of time. *Biochemistry*. 2011;50(19):4087-4096.  
581 doi:10.1021/bi1019435.
- 582 17. Akitake B, Anishkin A, Liu N, Sukharev S. Straightening and sequential buckling of the  
583 pore-lining helices define the gating cycle of MscS. *Nat Struct Mol Biol*.  
584 2007;14(12):1141-1149. doi:10.1038/nsmb1341.
- 585 18. Belyy V, Kamaraju K, Akitake B, Anishkin A, Sukharev S. Adaptive behavior of bacterial  
586 mechanosensitive channels is coupled to membrane mechanics. *J Gen Physiol*.  
587 2010;135(6):641-652. doi:10.1085/jgp.200910371.
- 588 19. Kamaraju K, Belyy V, Rowe I, Anishkin A, Sukharev S. The pathway and spatial scale for  
589 MscS inactivation. *J Gen Physiol*. 2011;138(1):49-57. doi:10.1085/jgp.201110606.
- 590 20. Vásquez V. MscS inactivation: an exception rather than the rule. An extremophilic MscS  
591 reveals diversity within the family. *Biophys J*. 2013;104(7):1391-1393.  
592 doi:10.1016/j.bpj.2013.02.010.
- 593 21. Edwards MD, Bartlett W, Booth IR. Pore mutations of the *Escherichia coli* MscS channel  
594 affect desensitization but not ionic preference. *Biophys J*. 2008;94(8):3003-3013.  
595 doi:10.1529/biophysj.107.123448.
- 596 22. Bass RB, Strop P, Barclay M, Rees DC. Crystal structure of *Escherichia coli* MscS, a  
597 voltage-modulated and mechanosensitive channel. *Science*. 2002;298(5598):1582-1587.  
598 doi:10.1126/science.1077945.
- 599 23. Zhang X, Wang J, Feng Y, et al. Structure and molecular mechanism of an anion-selective  
600 mechanosensitive channel of small conductance. *Proc Natl Acad Sci USA*.  
601 2012;109(44):18180-18185. doi:10.1073/pnas.1207977109.
- 602 24. Lai JY, Poon YS, Kaiser JT, Rees DC. Open and shut: crystal structures of the  
603 dodecylmaltoside solubilized mechanosensitive channel of small conductance from  
604 *Escherichia coli* and *Helicobacter pylori* at 4.4 Å and 4.1 Å resolutions. *Protein Sci*.  
605 2013;22(4):502-509. doi:10.1002/pro.2222.
- 606 25. Böttcher B, Prazak V, Rasmussen A, Black SS, Rasmussen T. The Structure of YnaI  
607 Implies Structural and Mechanistic Conservation in the MscS Family of Mechanosensitive  
608 Channels. *Structure*. 2015;23(9):1705-1714. doi:10.1016/j.str.2015.06.023.

- 609 26. Miller S, Bartlett W, Chandrasekaran S, Simpson S, Edwards M, Booth IR. Domain  
610 organization of the MscS mechanosensitive channel of Escherichia coli. *EMBO J*.  
611 2003;22(1):36-46. doi:10.1093/emboj/cdg011.
- 612 27. Rasmussen T, Edwards MD, Black SS, Rasmussen A, Miller S, Booth IR. Tryptophan in  
613 the pore of the mechanosensitive channel MscS: assessment of pore conformations by  
614 fluorescence spectroscopy. *J Biol Chem*. 2010;285(8):5377-5384.  
615 doi:10.1074/jbc.M109.071472.
- 616 28. Edwards MD, Li Y, Kim S, et al. Pivotal role of the glycine-rich TM3 helix in gating the  
617 MscS mechanosensitive channel. *Nat Struct Mol Biol*. 2005;12(2):113-119.  
618 doi:10.1038/nsmb895.
- 619 29. Anishkin A, Akitake B, Sukharev S. Characterization of the resting MscS: modeling and  
620 analysis of the closed bacterial mechanosensitive channel of small conductance. *Biophys*  
621 *J*. 2008;94(4):1252-1266. doi:10.1529/biophysj.107.110171.
- 622 30. Wang W, Black SS, Edwards MD, et al. The structure of an open form of an E. coli  
623 mechanosensitive channel at 3.45 Å resolution. *Science*. 2008;321(5893):1179-1183.  
624 doi:10.1126/science.1159262.
- 625 31. Malcolm HR, Blount P. Mutations in a Conserved Domain of E. coli MscS to the Most  
626 Conserved Superfamily Residue Leads to Kinetic Changes. Ye S, ed. *PLoS ONE*.  
627 2015;10(9):e0136756. doi:10.1371/journal.pone.0136756.
- 628 32. Belyy V, Anishkin A, Kamaraju K, Liu N, Sukharev S. The tension-transmitting “clutch”  
629 in the mechanosensitive channel MscS. *Nat Struct Mol Biol*. 2010;17(4):451-458.  
630 doi:10.1038/nsmb.1775.
- 631 33. Gamini R, Sotomayor M, Chipot C, Schulten K. Cytoplasmic domain filter function in the  
632 mechanosensitive channel of small conductance. *Biophys J*. 2011;101(1):80-89.  
633 doi:10.1016/j.bpj.2011.05.042.
- 634 34. Cox CD, Nomura T, Ziegler CS, Campbell AK, Wann KT, Martinac B. Selectivity  
635 mechanism of the mechanosensitive channel MscS revealed by probing channel  
636 subconducting states. *Nature Communications*. 2013;4:2137. doi:10.1038/ncomms3137.
- 637 35. Naismith JH, Booth IR. Bacterial mechanosensitive channels--MscS: evolution's solution  
638 to creating sensitivity in function. *Annu Rev Biophys*. 2012;41(1):157-177.  
639 doi:10.1146/annurev-biophys-101211-113227.
- 640 36. Booth IR, Blount P. The MscS and MscL families of mechanosensitive channels act as  
641 microbial emergency release valves. *J Bacteriol*. 2012;194(18):4802-4809.  
642 doi:10.1128/JB.00576-12.
- 643 37. Pivetti CD, Yen M-R, Miller S, et al. Two families of mechanosensitive channel proteins.  
644 *Microbiol Mol Biol Rev*. 2003;67(1):66–85–tableofcontents. doi:10.1128/MMBR.67.1.66-  
645 85.2003.

- 646 38. Haswell ES. MscS-Like Proteins in Plants. In: *Mechanosensitive Ion Channels, Part A*.  
647 Vol 58. Current Topics in Membranes. Elsevier; 2007:329-359. doi:10.1016/S1063-  
648 5823(06)58013-5.
- 649 39. Martinac B, Kloda A. Evolutionary origins of mechanosensitive ion channels. *Prog*  
650 *Biophys Mol Biol*. 2003;82(1-3):11-24.
- 651 40. Cox CD, Nakayama Y, Nomura T, Martinac B. The evolutionary “tinkering” of MscS-like  
652 channels: generation of structural and functional diversity. *Pflugers Arch*. 2015;467(1):3-  
653 13. doi:10.1007/s00424-014-1522-2.
- 654 41. Nakayama Y, Yoshimura K, Iida H. Organellar mechanosensitive channels in fission yeast  
655 regulate the hypo-osmotic shock response. *Nature Communications*. 2012;3:1020.  
656 doi:10.1038/ncomms2014.
- 657 42. Nakayama Y, Fujiu K, Sokabe M, Yoshimura K. Molecular and electrophysiological  
658 characterization of a mechanosensitive channel expressed in the chloroplasts of  
659 *Chlamydomonas*. *Proc Natl Acad Sci USA*. 2007;104(14):5883-5888.  
660 doi:10.1073/pnas.0609996104.
- 661 43. Maksaev G, Haswell ES. MscS-Like10 is a stretch-activated ion channel from  
662 *Arabidopsis thaliana* with a preference for anions. *Proc Natl Acad Sci USA*.  
663 2012;109(46):19015-19020. doi:10.1073/pnas.1213931109.
- 664 44. Hamilton ES, Jensen GS, Maksaev G, Katims A, Sherp AM, Haswell ES.  
665 Mechanosensitive channel MSL8 regulates osmotic forces during pollen hydration and  
666 germination. *Science*. 2015;350(6259):438-441. doi:10.1126/science.aac6014.
- 667 45. Lee CP, Maksaev G, Jensen GS, et al. MSL1 is a mechanosensitive ion channel that  
668 dissipates mitochondrial membrane potential and maintains redox homeostasis in  
669 mitochondria during abiotic stress. *Plant J*. August 2016. doi:10.1111/tpj.13301.
- 670 46. Kloda A, Martinac B. Molecular identification of a mechanosensitive channel in archaea.  
671 *Biophysj*. 2001;80(1):229-240. doi:10.1016/S0006-3495(01)76009-2.
- 672 47. Malcolm HR, Heo Y-Y, Caldwell DB, et al. Ss-bCNGa: a unique member of the bacterial  
673 cyclic nucleotide gated (bCNG) channel family that gates in response to mechanical  
674 tension. *Eur Biophys J*. 2012;41(12):1003-1013. doi:10.1007/s00249-012-0855-z.
- 675 48. Çetiner U, Rowe I, Schams A, et al. Tension-activated channels in the mechanism of  
676 osmotic fitness in *Pseudomonas aeruginosa*. *J Gen Physiol*. 2017;149(5):595-609.  
677 doi:10.1085/jgp.201611699.
- 678 49. Nakayama Y, Yoshimura K, Iida H. Electrophysiological characterization of the  
679 mechanosensitive channel MscCG in *Corynebacterium glutamicum*. *Biophys J*.  
680 2013;105(6):1366-1375. doi:10.1016/j.bpj.2013.06.054.

- 681 50. Haswell ES, Meyerowitz EM. MscS-like proteins control plastid size and shape in  
682 *Arabidopsis thaliana*. *Curr Biol*. 2006;16(1):1-11. doi:10.1016/j.cub.2005.11.044.
- 683 51. Haswell ES, Peyronnet R, Barbier-Brygoo H, Meyerowitz EM, Frachisse J-M. Two MscS  
684 homologs provide mechanosensitive channel activities in the *Arabidopsis* root. *Curr Biol*.  
685 2008;18(10):730-734. doi:10.1016/j.cub.2008.04.039.
- 686 52. Maksaev G, Haswell ES. Expression and characterization of the bacterial  
687 mechanosensitive channel MscS in *Xenopus laevis* oocytes. *J Gen Physiol*.  
688 2011;138(6):641-649. doi:10.1085/jgp.201110723.
- 689 53. Hamilton ES, Haswell ES. The Tension-sensitive Ion Transport Activity of MSL8 is  
690 Critical for its Function in Pollen Hydration and Germination. *Plant and Cell Physiology*.  
691 January 2017:1-16. doi:10.1093/pcp/pcw230.
- 692 54. Veley KM, Maksaev G, Frick EM, January E, Kloepper SC, Haswell ES. *Arabidopsis*  
693 MSL10 has a regulated cell death signaling activity that is separable from its  
694 mechanosensitive ion channel activity. *Plant Cell*. 2014;26(7):3115-3131.  
695 doi:10.1105/tpc.114.128082.
- 696 55. Zou Y, Chintamanani S, He P, et al. A gain-of-function mutation in Msl10 triggers cell  
697 death and wound-induced hyperaccumulation of jasmonic acid in *Arabidopsis*. *J Integr*  
698 *Plant Biol*. 2016;58(6):600-609. doi:10.1111/jipb.12427.
- 699 56. Zhang Y. I-TASSER server for protein 3D structure prediction. *BMC Bioinformatics*.  
700 2008;9(1):40. doi:10.1186/1471-2105-9-40.
- 701 57. Steinbacher S, Bass R, Strop P, Rees DC. Structures of the Prokaryotic Mechanosensitive  
702 Channels MscL and MscS. In: *Mechanosensitive Ion Channels, Part A*. Vol 58. Current  
703 Topics in Membranes. Elsevier; 2007:1-24. doi:10.1016/S1063-5823(06)58001-9.
- 704 58. Schwacke R, Schneider A, van der Graaff E, et al. ARAMEMNON, a novel database for  
705 *Arabidopsis* integral membrane proteins. *Plant Physiol*. 2003;131(1):16-26.  
706 doi:10.1104/pp.011577.
- 707 59. Maksaev G, Haswell ES. Expressing and characterizing mechanosensitive channels in  
708 *Xenopus* oocytes. *Methods Mol Biol*. 2015;1309(Chapter 13):151-169. doi:10.1007/978-1-  
709 4939-2697-8\_13.
- 710 60. Blount P, Sukharev SI, Schroeder MJ, Nagle SK, Kung C. Single residue substitutions that  
711 change the gating properties of a mechanosensitive channel in *Escherichia coli*. *Proc Natl*  
712 *Acad Sci USA*. 1996;93(21):11652-11657.
- 713 61. Anishkin A, Sukharev S. Water dynamics and dewetting transitions in the small  
714 mechanosensitive channel MscS. *Biophysj*. 2004;86(5):2883-2895. doi:10.1016/S0006-  
715 3495(04)74340-4.

- 716 62. Chen Y-H, Hu L, Punta M, et al. Homologue structure of the SLAC1 anion channel for  
717 closing stomata in leaves. *Nature*. 2010;467(7319):1074-1080. doi:10.1038/nature09487.
- 718 63. Peyronnet R, Tran D, Girault T, Frachisse J-M. Mechanosensitive channels: feeling  
719 tension in a world under pressure. *Front Plant Sci*. 2014;5(204):558.  
720 doi:10.3389/fpls.2014.00558.
- 721 64. Feinshreiber L, Singer-Lahat D, Friedrich R, et al. Non-conducting function of the Kv2.1  
722 channel enables it to recruit vesicles for release in neuroendocrine and nerve cells. *Journal*  
723 *of Cell Science*. 2010;123(Pt 11):1940-1947. doi:10.1242/jcs.063719.
- 724 65. Kruger LC, Isom LL. Voltage-Gated Na<sup>+</sup> Channels: Not Just for Conduction. *Cold Spring*  
725 *Harb Perspect Biol*. 2016;8(6):a029264. doi:10.1101/cshperspect.a029264.
- 726 66. Koprowski P, Grajkowski W, Balcerzak M, Filipiuk I, Fabczak H, Kubalski A.  
727 Cytoplasmic Domain of MscS Interacts with Cell Division Protein FtsZ: A Possible Non-  
728 Channel Function of the Mechanosensitive Channel in Escherichia Coli. Fotiadis D, ed.  
729 *PLoS ONE*. 2015;10(5):e0127029. doi:10.1371/journal.pone.0127029.
- 730 67. Okonechnikov K, Golosova O, Fursov M, UGENE team. Unipro UGENE: a unified  
731 bioinformatics toolkit. *Bioinformatics*. 2012;28(8):1166-1167.  
732 doi:10.1093/bioinformatics/bts091.
- 733 68. Humphrey W, Dalke A, Schulten K. VMD: visual molecular dynamics. *J Mol Graph*.  
734 1996;14(1):33-8-27-8.
- 735 69. Garabagi F, Gilbert E, Loos A, McLean MD, Hall JC. Utility of the P19 suppressor of  
736 gene-silencing protein for production of therapeutic antibodies in Nicotiana expression  
737 hosts. *Plant Biotechnol J*. 2012;10(9):1118-1128. doi:10.1111/j.1467-7652.2012.00742.x.
- 738
